# Supplementary material for: Home Virtual Visits for Outpatient Follow-Up Stroke Care: Cross-Sectional Study
Source: PubMed Central journal article supplement (PMC6803894; doi:10.2196/13734), 2019-10-07
Supplement: jmir_v21i10e13734_app2.pdf [file jmir_v21i10e13734_app2.pdf]

## Multimedia Appendix-2

### Volume of patients seen in the stroke prevention clinic during the pilot phase\*

|                                                                       |     |
|-----------------------------------------------------------------------|-----|
| Total number of patients seen in the clinic (Aug 1 2018-Jan 31 219)   | 383 |
| New patients seen*                                                    | 194 |
| Total Follow-up's (in-person and Evisit)                              | 189 |
| The proportion of E-visit Follow-up's                                 | 40% |
| Evisits scheduled                                                     | 81  |
| Evisits completed                                                     | 75  |
| First-time Evisits                                                    | 60  |
| Follow up Evisits                                                     | 15  |
| Evisit no-show                                                        | 2   |
| Evisits canceled due to technical issues during test visit            | 2   |
| Evisits canceled due to technical issues during the physician Evisit. | 2   |

\*The volumes reflect the patients seen by the one physician(RA) involved in the pilot study. The stroke prevention clinic is staffed by 3 physicians, and the workload is equally shared among them.
