# Supplementary material for: Home Virtual Visits for Outpatient Follow-Up Stroke Care: Cross-Sectional Study
Source: PubMed Central journal article supplement (PMC6803894; doi:10.2196/13734), 2019-10-07
Supplement: jmir_v21i10e13734_app3.pdf [file jmir_v21i10e13734_app3.pdf]

## Multimedia Appendix - 3

### Distance and time savings for patients

|                                            | <b>Total</b> | <b>Mean (SD)</b> | <b>Median (IQR)</b> |
|--------------------------------------------|--------------|------------------|---------------------|
| <b>Distance</b>                            |              |                  |                     |
| Estimated travel distance avoided (Km)     | 4337.2       | 60.24 (67.12)    | 30.1 (11.2-82.2)    |
| <b>Time</b>                                |              |                  |                     |
| Estimated travel time saved (minutes)      | 3845.2       | 52.39 (42.25)    | 44 (21-69)          |
| Estimated total time saved (minutes)       | 6005.2       | 88.55 (46.54)    | 80 (50-102)         |
| Patient self-reported time saved (minutes) |              | 85.37 (39.41)    | 75 (60-120)         |
