# Supplementary material for: Home Virtual Visits for Outpatient Follow-Up Stroke Care: Cross-Sectional Study
Source: PubMed Central journal article supplement (PMC6803894; doi:10.2196/13734), 2019-10-07
Supplement: jmir_v21i10e13734_app4.pdf [file jmir_v21i10e13734_app4.pdf]

Multimedia Appendix 4

**Ambulatory care costs for CACS codes (E751 and E752) in Ontario and Alberta for 2016/2017**

| <b>CACS code</b> | <b>Description</b>                                     | <b>Median (CND)</b> | <b>Mean (CND)</b> |                |
|------------------|--------------------------------------------------------|---------------------|-------------------|----------------|
|                  |                                                        | <b>Alberta</b>      | <b>Alberta</b>    | <b>Ontario</b> |
| E751             | General Signs / Symptoms / Examination /Investigations | \$ 306.88           | \$ 334.04         | \$ 331         |
| E752             | Other Medical and Follow-up Care                       | \$ 217.60           | \$ 304.33         | \$ 397         |
